# Supplementary material
Source: PubMed Central journal article supplement (PMC2782051)
Supplement: supp_M109.011858_jbc.M109.011858-1.pdf [file supp_M109.011858_jbc.M109.011858-1.pdf]

*Sapparapu et al., Antigen-specific proteolysis by hybrid antibodies containing promiscuous proteolytic light chains paired with an antigen-binding heavy chain*

**Supplemental Table S1: Primers used to amplify IgG V domains.** Bold, annealing sequences; underline, restriction sites; italicized nucleotides, changes from wildtype sequence to accommodate *EcoRI* site; BCK, back; FRW, forward. PCR conditions: 1.5 mM MgCl<sub>2</sub>, 10 mM dNTP mixture, 0.2 μM each back and forward primers, 1 U Taq DNA polymerase and ~20 ng template DNA. Thermal cycling protocol: 1 denaturation cycle at 95°C, 5 min; 39 amplification cycles, each cycle consisting denaturation (1 min, 95°C), annealing (1 min, 55°C) and extension (1 min, 72°C). The final step was an extension to fill in incomplete fragments (10 min, 72°C).

|                         |                                                            |
|-------------------------|------------------------------------------------------------|
| CBH-7V <sub>H</sub> BCK | 5' TCTGAGGAATTC <b>CAGCTGGTGCAGTCTGGGGCTGAG</b>            |
| CBH-7V <sub>H</sub> FRW | 5' ACATGTGAAGCTT <b>GCTGCGGCGACGGTGACCCGGGT</b>            |
| CBH-7V <sub>L</sub> BCK | 5' GCACATTCCAGATCT <b>GACGTCCTGATGACCCAGTCTCCA</b>         |
| CBH-7V <sub>L</sub> FRW | 5' AGTTCTAGAGCGGCCGCAGTCCGTTT <b>GCTCTCGAGATTGGTCCCTCC</b> |
| HK14 V <sub>L</sub> BCK | 5' GCACATTCCAGATCT <b>GACATCGTGATGACCCAGTCT</b>            |
| HK14 V <sub>L</sub> FRW | 5' AGTTCTAGAGCGGCCGCAGTCCGTAAGATGTCCACCTTGGTCCCTCC         |
| HK13 V <sub>L</sub> BCK | 5' GCACATTCCAGATCT <b>GACATCGTGATGACCCAGTCTCCA</b>         |
| HK13 V <sub>L</sub> FRW | 5' AGTTCTAGAGCGGCCGCAGTCCGTT <b>CGATCTCTAGCTTGGTCCCTG</b>  |
| GG63 V <sub>L</sub> BCK | 5' GCACATTCCAGATCT <b>GACATCCAGATGACCCAGTCTCCT</b>         |
| GG63 V <sub>L</sub> FRW | 5' AGTCTAGAGCGGCCGCAGTCCGTT <b>GTGATTTCACCTGGGTCCC TTG</b> |
| GL2 V <sub>H</sub> BCK  | 5' TAGAATTC <b>CAGCTGSWGSAGTCKGG</b>                       |
| GL2 V <sub>H</sub> FRW  | 5' TAAAGCTT <b>GCTGAGGAGACGGTGACCA</b>                     |
| GL2 V <sub>K</sub> BCK  | 5' TAAGATCT <b>GAHATYSTGWTGACBCAGTCT</b>                   |
| GL2 V <sub>K</sub> FRW  | 5' TAGCGGCCGCAGTCCGTT <b>TRATHTCASC</b>                    |
